# Supplementary material for: Identifying areas of deforestation risk for REDD+ using a species modeling tool
Source: PubMed Central journal article supplement (PMC4257064; doi:10.1186/s13021-014-0010-5), 2014-11-29

Additional File 1. Land designation observed within the study area

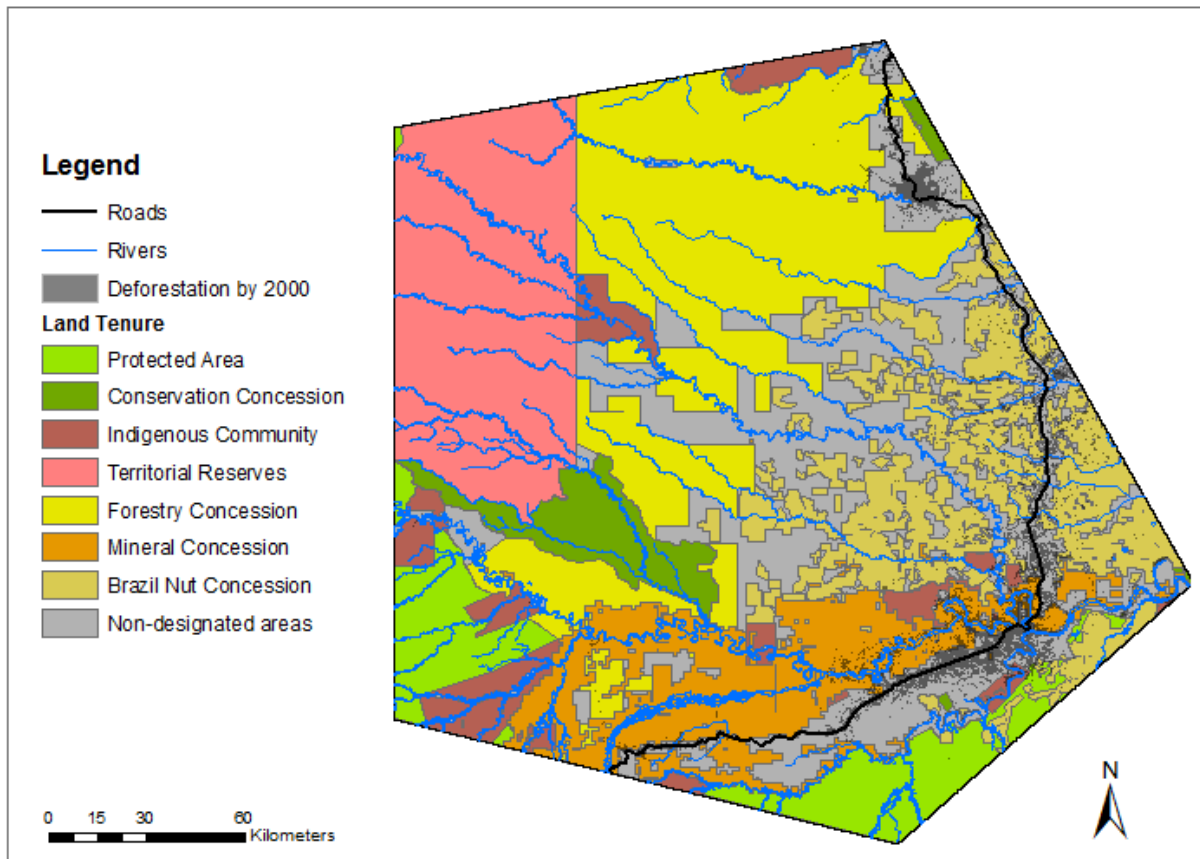

Supplement: s13021-014-0010-5-S1.pdf [file s13021-014-0010-5-S1.pdf]
