# Supplementary material for: Identifying areas of deforestation risk for REDD+ using a species modeling tool
Source: PubMed Central journal article supplement (PMC4257064; doi:10.1186/s13021-014-0010-5), 2014-11-29
Supplement: s13021-014-0010-5-S3.pdf [file s13021-014-0010-5-S3.pdf]

**Additional File 3. Friction coefficients used to calibrate the accessibility index analysis.** The coefficients were derived following [42]

| <b>Surface type</b>        | <b>Average speed (km/h)</b> | <b>Friction coefficient (seconds)</b> |
|----------------------------|-----------------------------|---------------------------------------|
| <b>Road –Asphalt</b>       | 90                          | 4                                     |
| <b>Road Dirt</b>           | 30                          | 12                                    |
| <b>Road- Track</b>         | 10                          | 36                                    |
| <b>River (navigable)</b>   | 10                          | 36                                    |
| <b>Savannah</b>            | 4                           | 90                                    |
| <b>Swamp Forest</b>        | 2                           | 180                                   |
| <b>Bamboo Forest</b>       | 1                           | 360                                   |
| <b>Dense Bamboo Forest</b> | 0.5                         | 720                                   |
| <b>Mature Forest</b>       | 3                           | 120                                   |
| <b>Secondary Forest</b>    | 2.5                         | 144                                   |
